# Supplementary material for: Stimulus-responsive room temperature phosphorescence materials with full-color tunability from pure organic amorphous polymers
Source: PubMed Central journal article supplement — Sci Adv. 2022 Feb 25;8(8):eabl8392. doi: 10.1126/sciadv.abl8392 (PMC8880773; doi:10.1126/sciadv.abl8392), 2022-02-25
Supplement: sciadv.abl8392_sm.pdf [file sciadv.abl8392_sm.pdf]

Supplementary Materials for  
**Stimulus-responsive room temperature phosphorescence materials with  
full-color tunability from pure organic amorphous polymers**

Dan Li, Jie Yang\*, Manman Fang, Ben Zhong Tang\*, Zhen Li\*

\*Corresponding author. Email: jieyang2018@tju.edu.cn (J.Y.); tangbenz@cuhk.edu.cn (B.Z.T.);  
lizhen@whu.edu.cn (Z.L.)

Published 25 February 2022, *Sci. Adv.* **8**, eabl8392 (2022)  
DOI: 10.1126/sciadv.abl8392

**The PDF file includes:**

Figs. S1 to S46  
Tables S1 and S2  
Legends for movies S1 to S5

**Other Supplementary Material for this manuscript includes the following:**

Movies S1 to S5

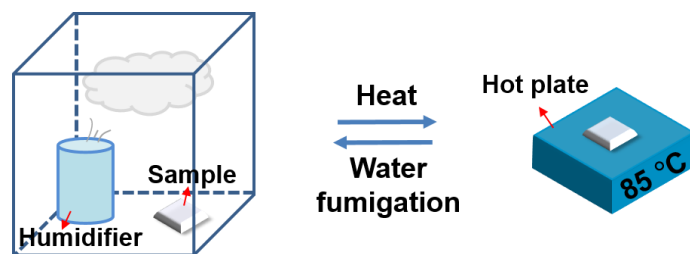

**fig. S1. The schematic diagram of heat/water stimulus-responsive processes.** First, put the prepared film and humidifier in a closed container. Ten minutes after the humidifier was turned on, the film was taken out and its RTP performance was studied. Then, heat the water-fumigated film at 85 °C for 10 minutes to desiccate. After the film was cooled to room temperature, its RTP effect was measured again. This process could be repeated for at least five times.

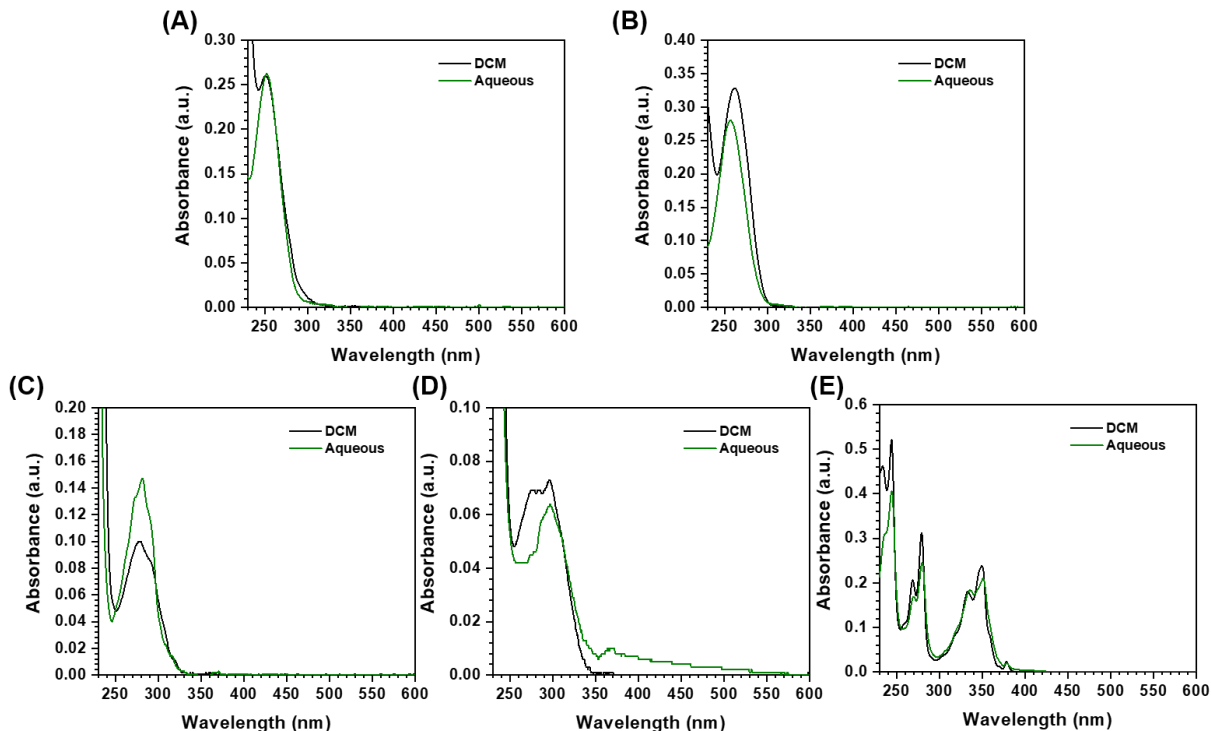

**fig. S2. The UV-vis absorption spectra of target polymers.** The UV-vis absorption spectra of aqueous phase (green line) and dichloromethane (DCM) solution (black line) after extracting (A) *m*-Bp-BOH-PVA, (B) *p*-Bp-BOH-PVA, (C) Nap-BOH-PVA, (D) BNap-BOH-PVA and (E) Py-BOH-PVA prepared aqueous solutions by dichloromethane (DCM) with the volume ratio of 1:1.

The reaction yield between PVA and arylboronic acids was calculated based on following equation:

$$A = \lg(1/T) = Kbc \quad (a)$$

$$\text{Reaction yield} = A_{\text{aqueous}} / (A_{\text{aqueous}} + A_{\text{DCM}})$$

Where A, T, K, b, c,  $A_{\text{aqueous}}$  and  $A_{\text{DCM}}$  are absorbance, transmittance, molar absorption coefficient, the distance the light travels in the sample and the concentration of the solution, absorbance in aqueous solution and absorbance in DCM solution.

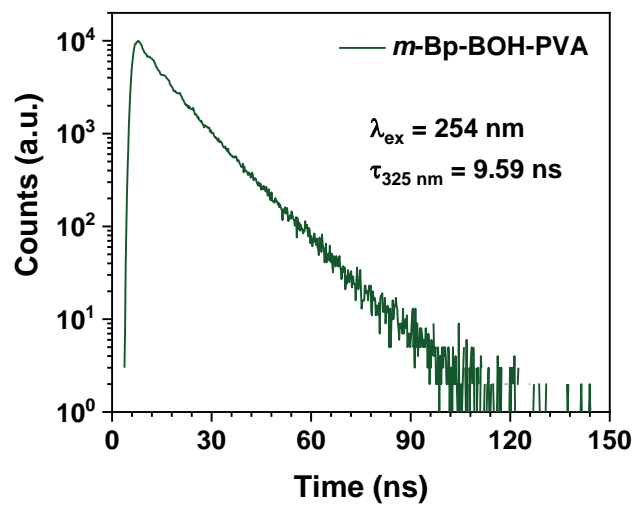

**fig. S3. Fluorescence lifetime of *m*-Bp-BOH-PVA film.** Time-resolved fluorescence-decay profile of *m*-Bp-BOH-PVA film.

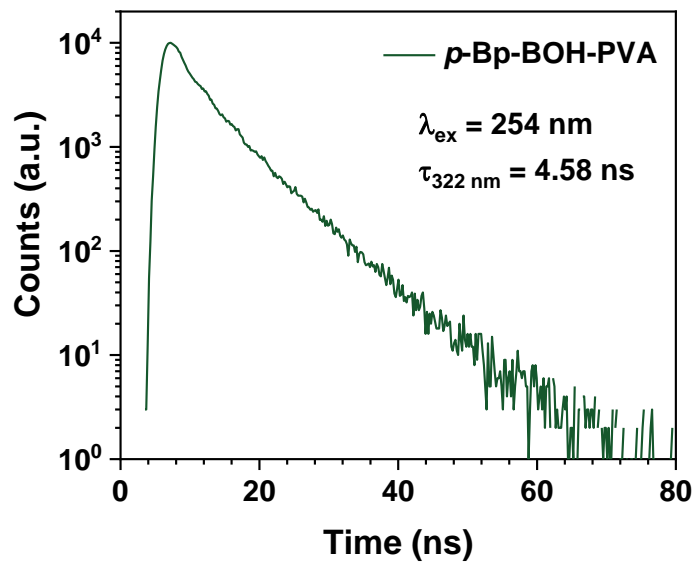

**fig. S4. Fluorescence lifetime of *p*-Bp-BOH-PVA film.** Time-resolved fluorescence-decay profile of *p*-Bp-BOH-PVA film.

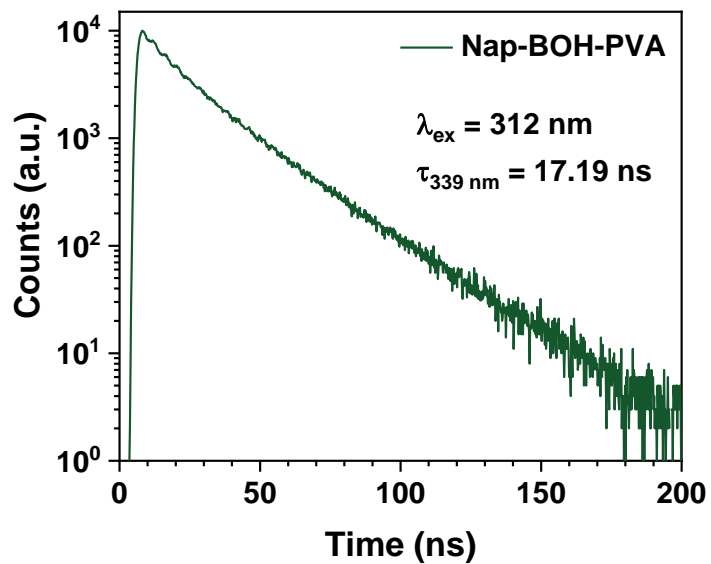

**fig. S5. Fluorescence lifetime of Nap-BOH-PVA film.** Time-resolved fluorescence-decay profile of Nap-BOH-PVA film.

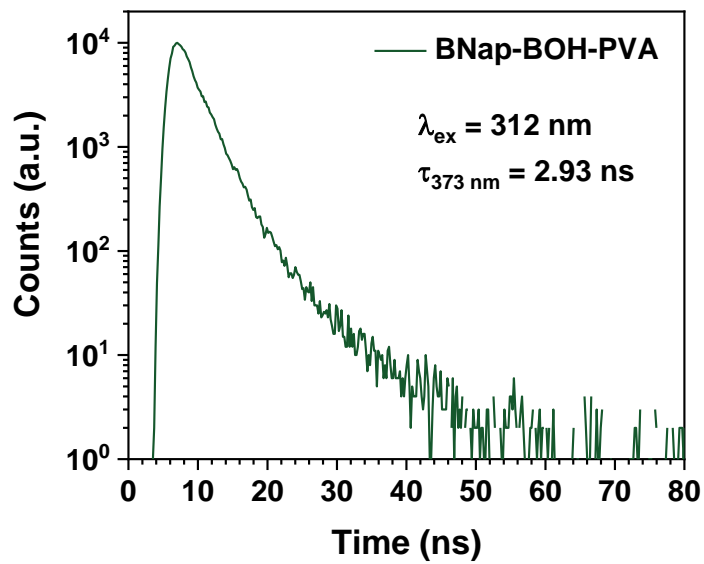

**fig. S6. Fluorescence lifetime of BNap-BOH-PVA film.** Time-resolved fluorescence-decay profile of BNap-BOH-PVA film.

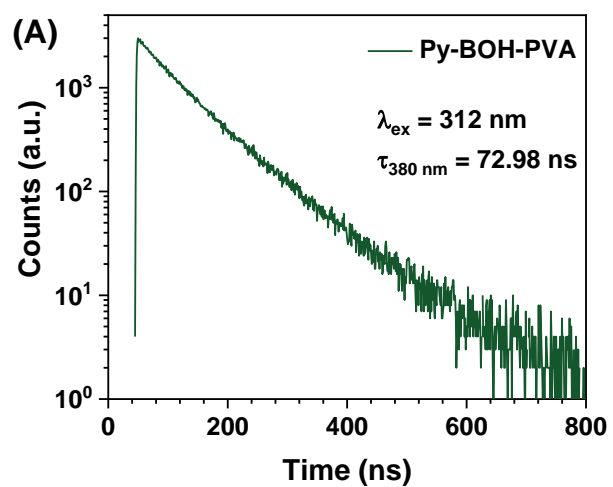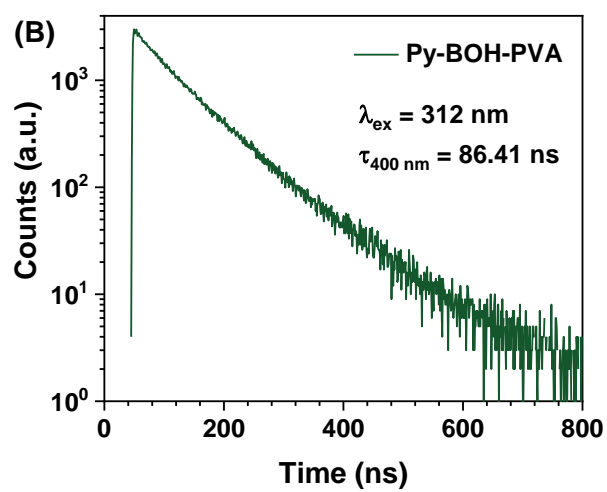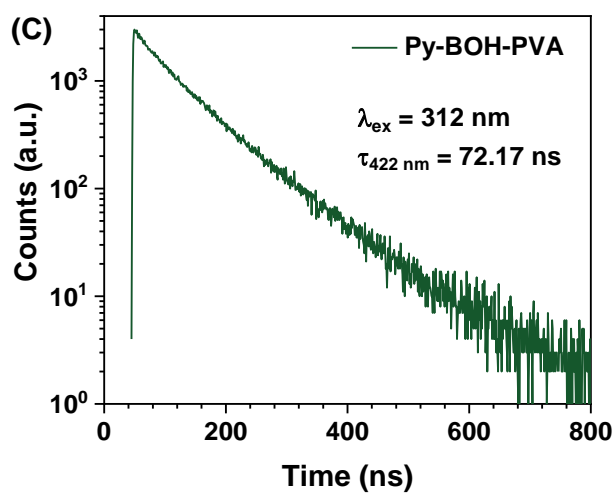

**fig. S7. Fluorescence lifetime of Py-BOH-PVA film.** Time-resolved fluorescence-decay profiles of Py-BOH-PVA film at emission peaks of 380 nm (A), 400 nm (B) and 422 nm (C) respectively.



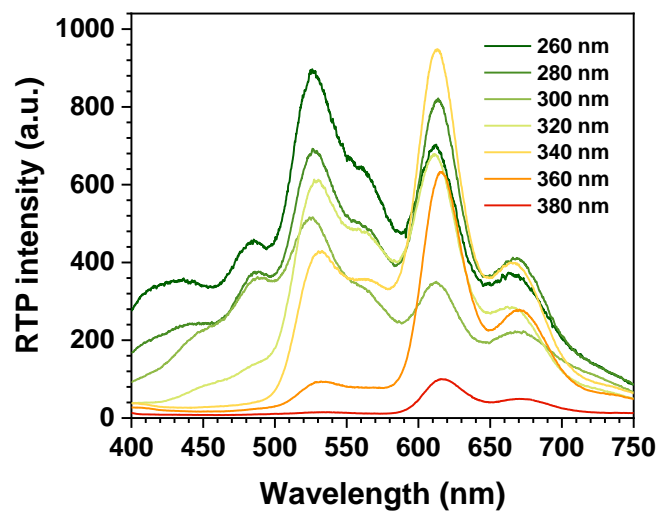

**fig. S8.** Excitation-dependent RTP spectra of Py-BOH-PVA. Phosphorescence spectra of Py-BOH-PVA excited by different wavelengths from 260 to 380 nm.

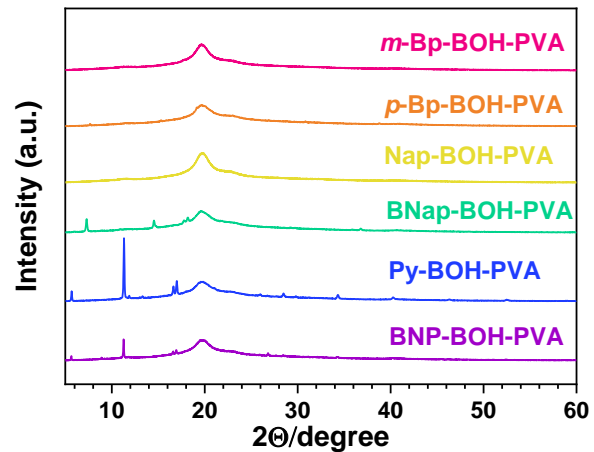

fig. S9. PXRd patterns of target polymers. Powder X-ray diffraction (PXRd) patterns of *m*-Bp-BOH-PVA, *p*-Bp-BOH-PVA, Nap-BOH-PVA, BNap-BOH-PVA, Py-BOH-PVA and BNP-BOH-PVA films.

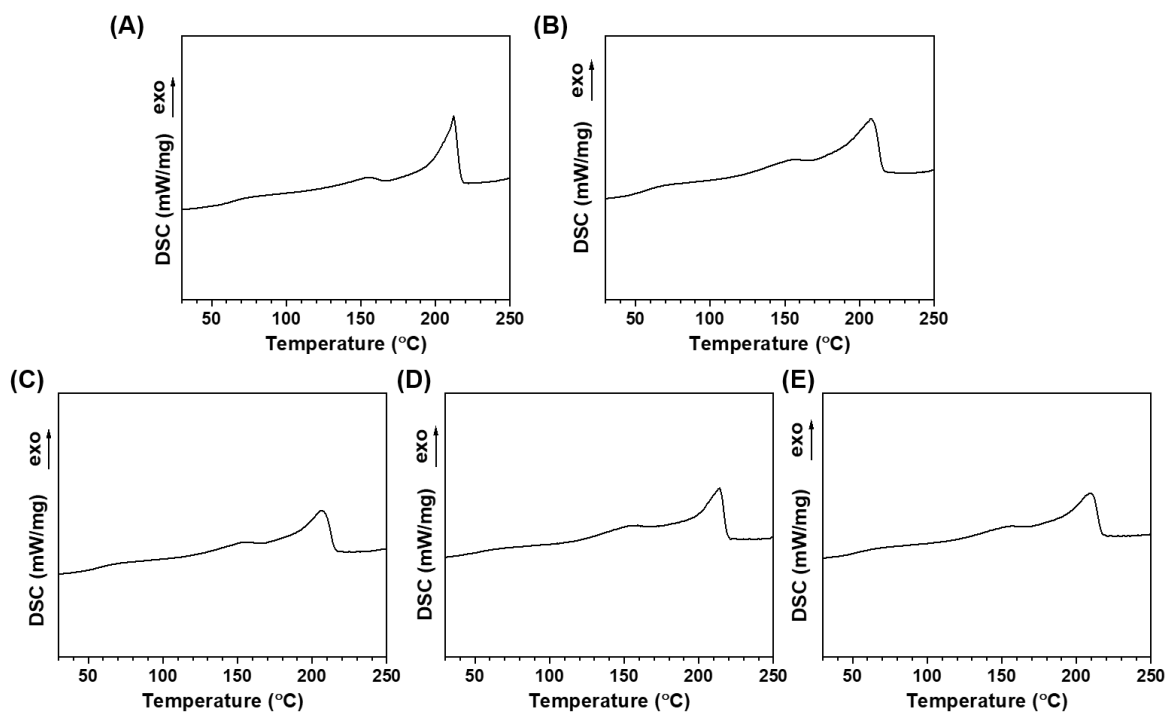

**fig. S10. DSC curves of target polymers.** The differential scanning calorimetry (DSC) curves of (A) *m*-Bp-BOH-PVA, (B) *p*-Bp-BOH-PVA, (C) Nap-BOH-PVA, (D) BNap-BOH-PVA and (E) Py-BOH-PVA (these data were extracted from the second cycle).

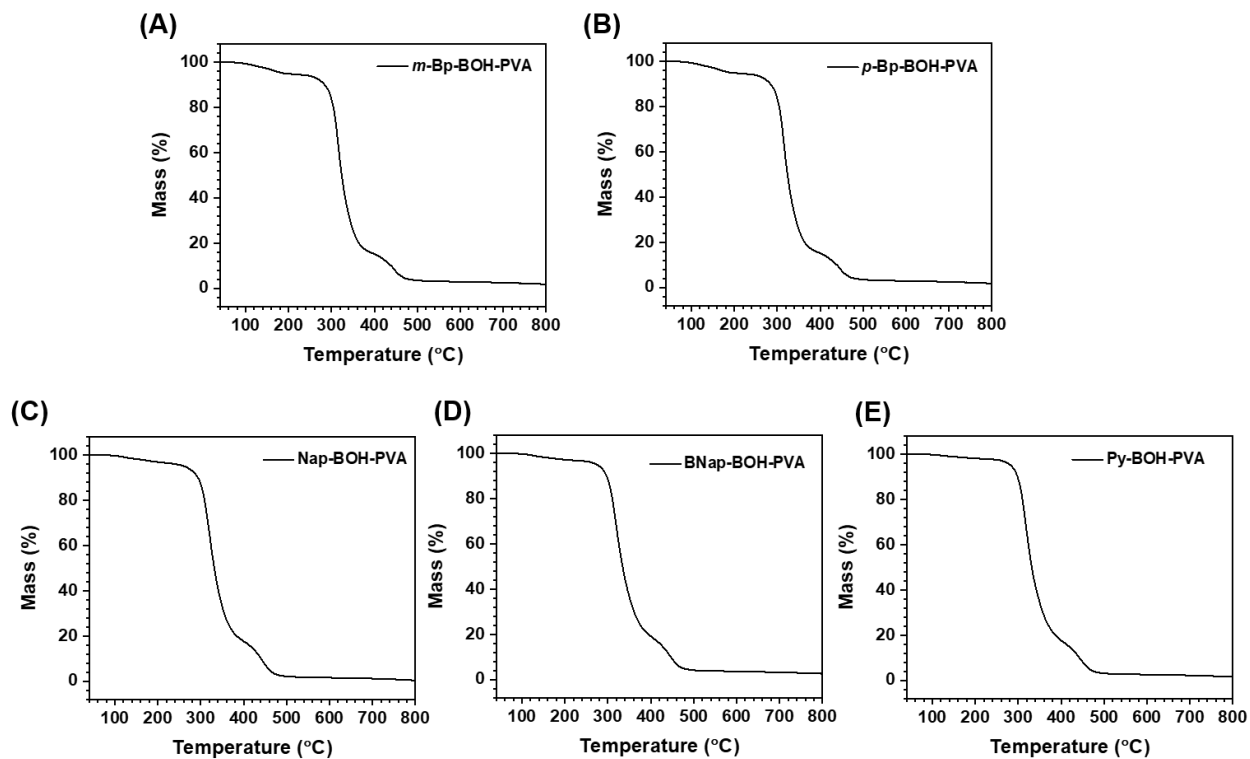

**fig. S11. TGA curves of target polymers.** The thermogravimetric analysis (TGA) curves of (A) *m*-Bp-BOH-PVA, (B) *p*-Bp-BOH-PVA, (C) Nap-BOH-PVA, (D) BNap-BOH-PVA and (E) Py-BOH-PVA.

**table S1. Thermal properties of target polymers.** Glass transition temperature and thermal decomposition temperature of ***m*-Bp-BOH-PVA**, ***p*-Bp-BOH-PVA**, **Nap-BOH-PVA**, **BNap-BOH-PVA** and **Py-BOH-PVA**.

|                            | Glass transition temperature/°C | Decomposition temperature <sup>a)</sup> /°C |
|----------------------------|---------------------------------|---------------------------------------------|
| <b><i>m</i>-Bp-BOH-PVA</b> | 52.8                            | 315.1                                       |
| <b><i>p</i>-Bp-BOH-PVA</b> | 45.6                            | 316.9                                       |
| <b>Nap-BOH-PVA</b>         | 42.6                            | 321.8                                       |
| <b>BNap-BOH-PVA</b>        | 58.9                            | 321.3                                       |
| <b>Py-BOH-PVA</b>          | 43.5                            | 318.9                                       |

<sup>a)</sup> Decomposition temperatures are based on the decomposition onset temperature.

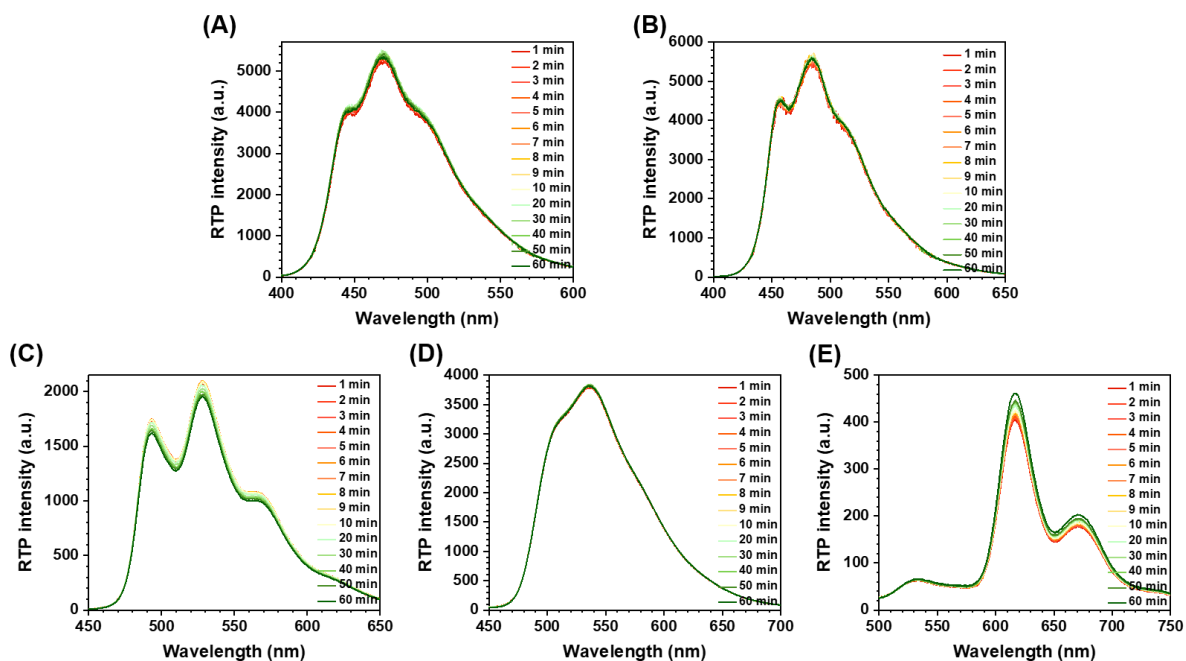

**fig. S12. Photostability of target polymers.** Phosphorescence spectra illuminated by UV lamp for different times (1-60 min) of (A) *m*-Bp-BOH-PVA, (B) *p*-Bp-BOH-PVA, (C) Nap-BOH-PVA, (D) BNap-BOH-PVA and (E) Py-BOH-PVA films.

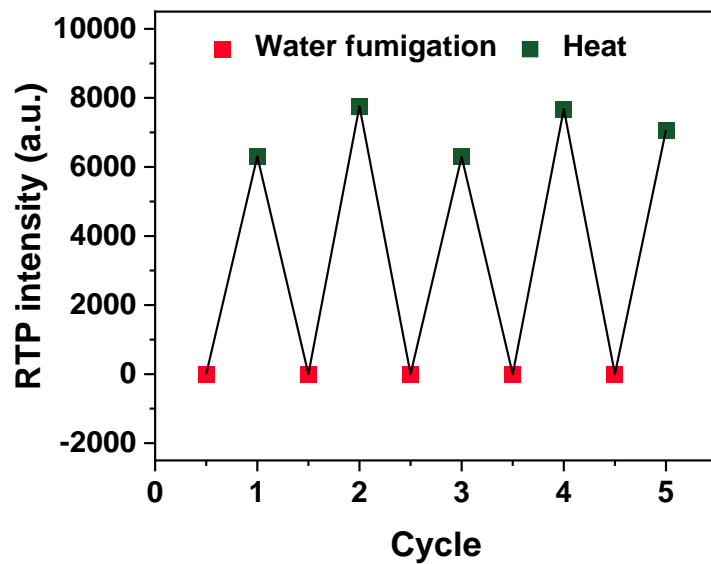

**fig. S13.** Cycles of stimulus-responsive RTP effect for *m*-Bp-BOH-PVA. Repeated cycles of the heating/water fuming processes of *m*-Bp-BOH-PVA film. The RTP intensity represents the phosphorescence emission intensity at 470 nm at room temperature.

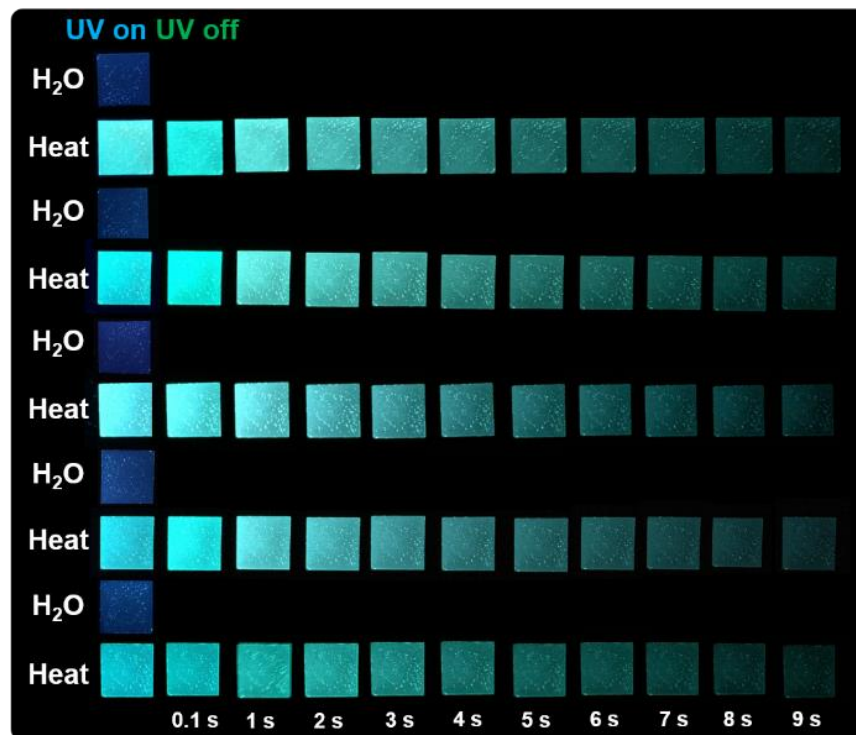

**fig. S14.** Photographs of repeated stimulus-responsive RTP effect for *m*-Bp-BOH-PVA. Photographs of repeated cycles of the heating/water fuming processes of *m*-Bp-BOH-PVA film.



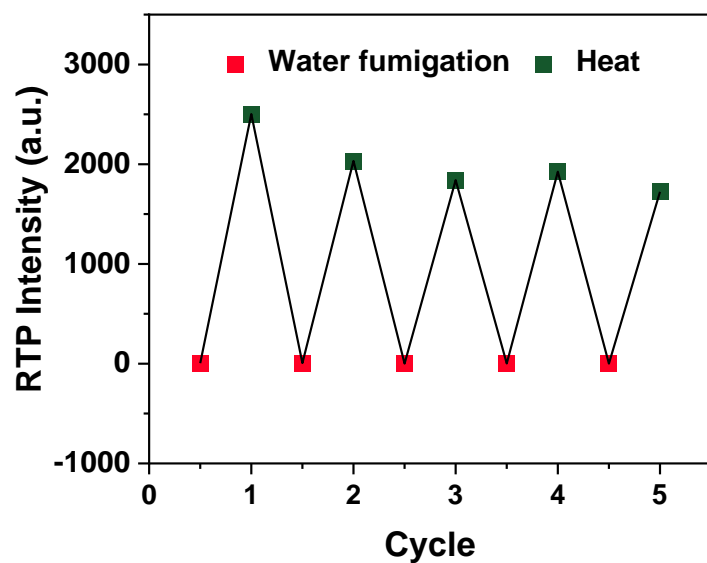

**fig. S15.** Cycles of stimulus-responsive RTP effect for *p*-Bp-BOH-PVA. Repeated cycles of the heating/water fuming processes of *p*-Bp-BOH-PVA film. The RTP intensity represents the phosphorescence emission intensity at 485 nm at room temperature.

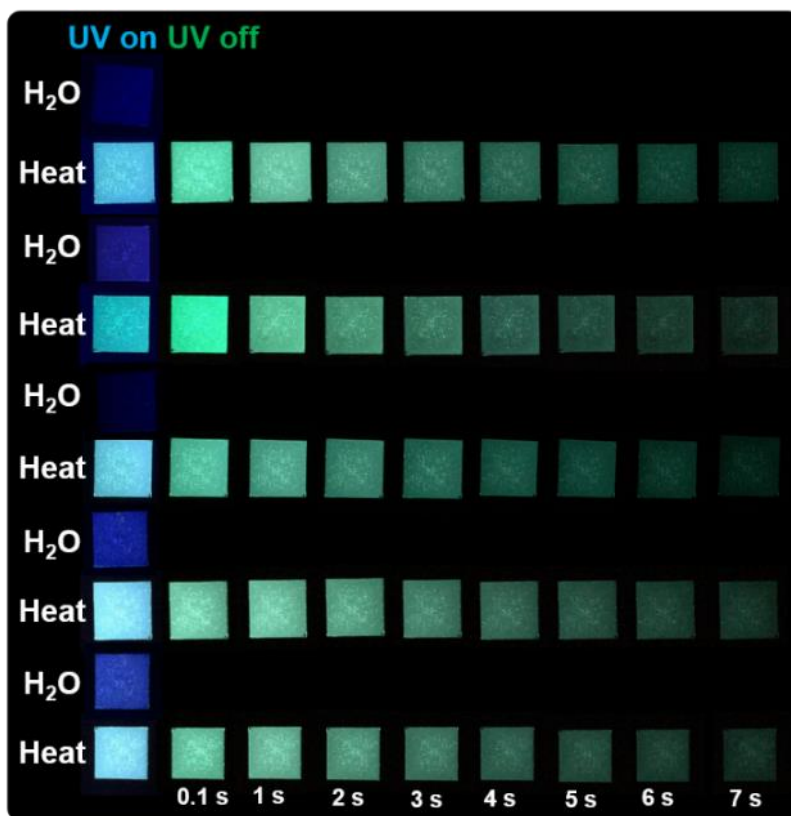

**fig. S16.** Photographs of repeated stimulus-responsive RTP effect for *p*-Bp-BOH-PVA. Photographs of repeated cycles of the heating/water fuming processes of *p*-Bp-BOH-PVA film.

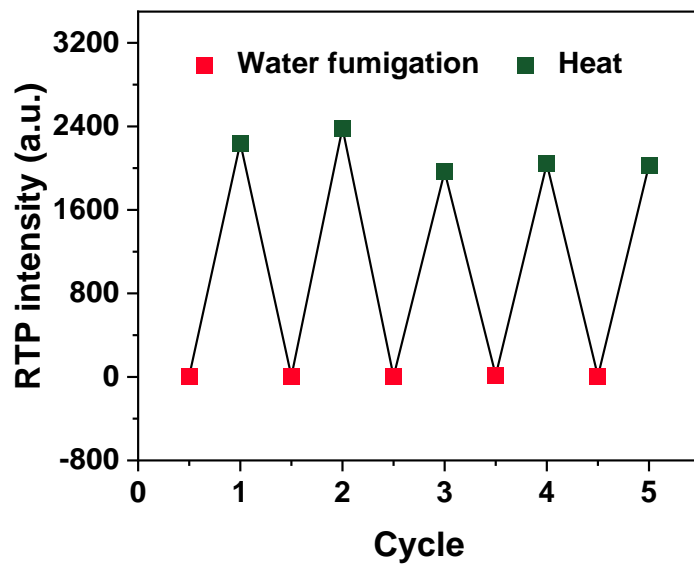

**fig. S17. Cycles of stimulus-responsive RTP effect for Nap-BOH-PVA.** Repeated cycles of the heating/water fuming processes of Nap-BOH-PVA film. The RTP intensity represents the phosphorescence emission intensity at 525 nm at room temperature.

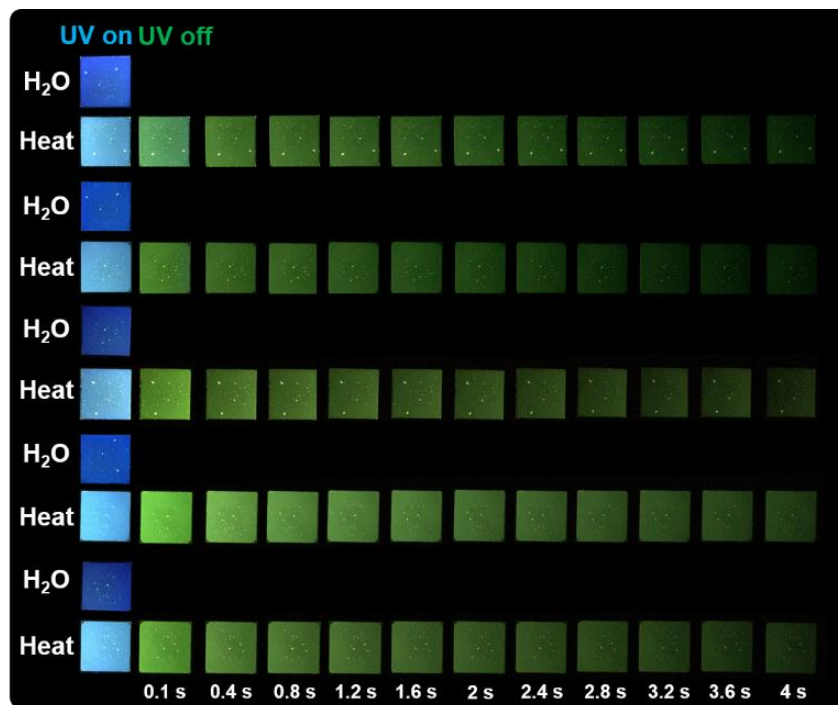

**fig. S18. Photographs of repeated stimulus-responsive RTP effect for Nap-BOH-PVA.** Photographs of repeated cycles of the heating/water fuming processes of Nap-BOH-PVA film.

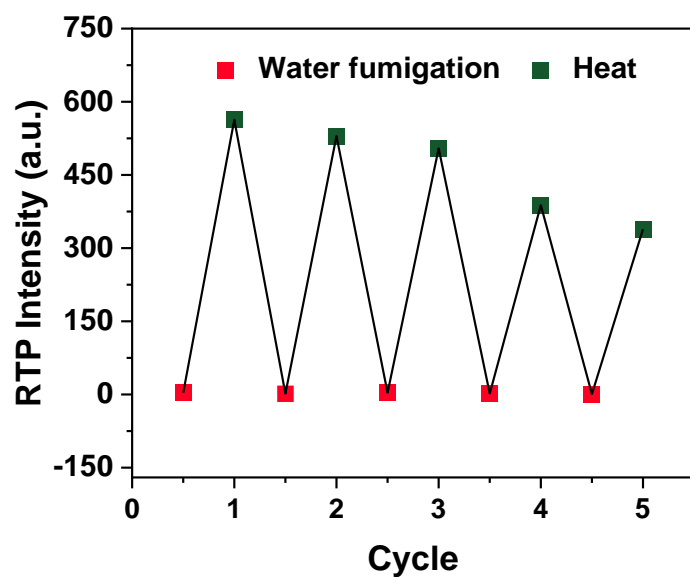

**fig. S19.** Cycles of stimulus-responsive RTP effect for BNap-BOH-PVA. Repeated cycles of the heating/water fuming processes of BNap-BOH-PVA film. The RTP intensity represents the phosphorescence emission intensity at 535 nm at room temperature.

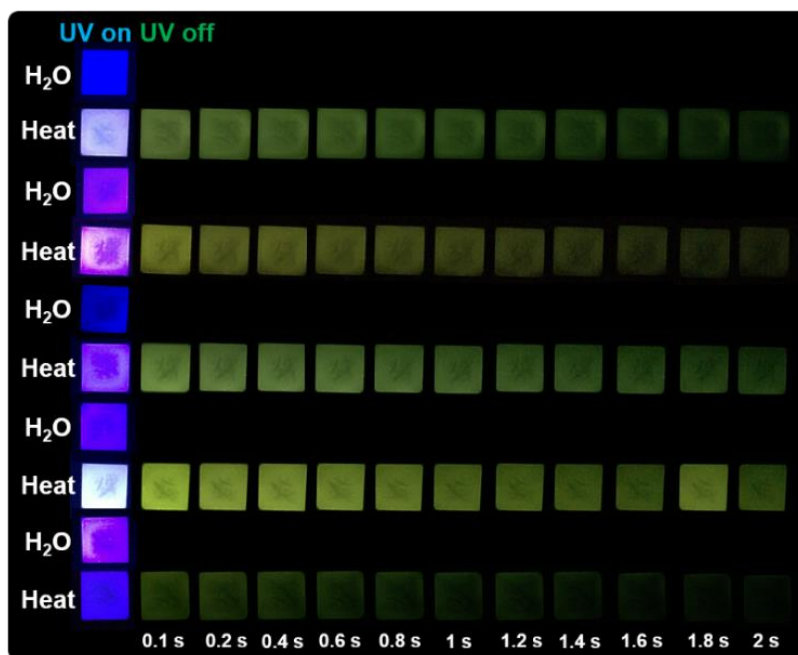

**fig. S20. Photographs of repeated stimulus-responsive RTP effect for BNap-BOH-PVA.** Photographs of repeated cycles of the heating/water fuming processes of BNap-BOH-PVA film.

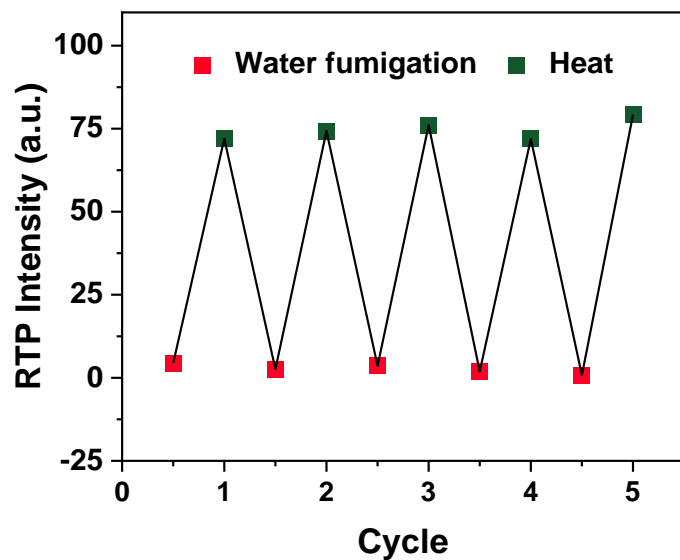

**fig. S21.** Cycles of stimulus-responsive RTP effect for Py-BOH-PVA. Repeated cycles of the heating/water fuming processes of Py-BOH-PVA film. The RTP intensity represents the phosphorescence emission intensity at 610 nm at room temperature.

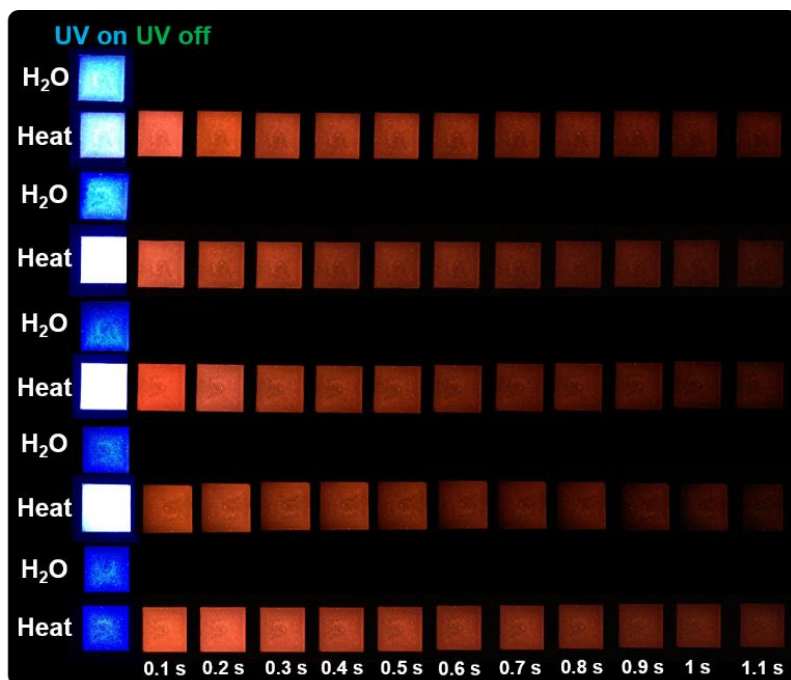

**fig. S22. Photographs of repeated stimulus-responsive RTP effect for Py-BOH-PVA.** Photographs of repeated cycles of the heating/water fuming processes of Py-BOH-PVA film.



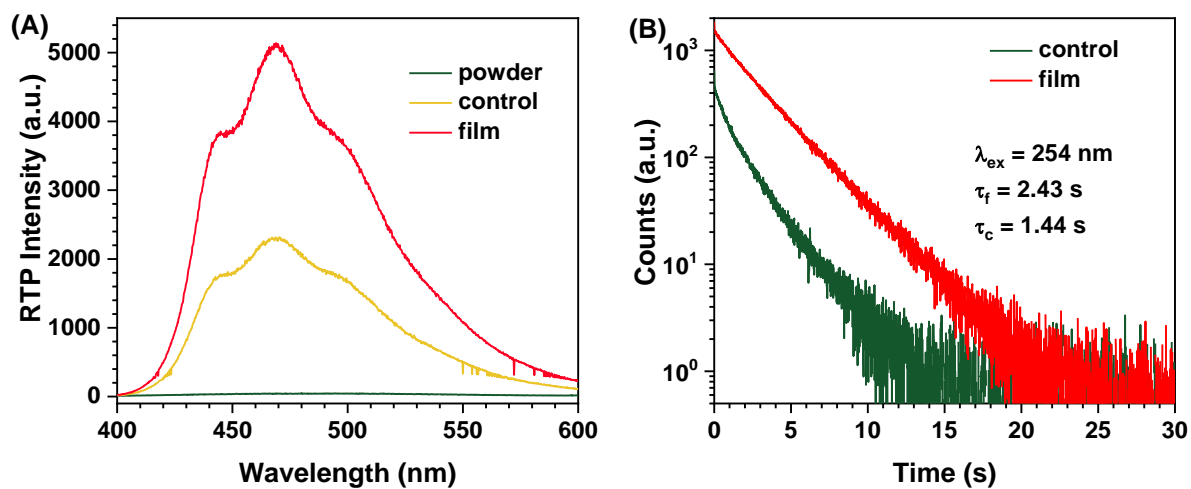

fig. S23. RTP behaviors of *m*-Bp-BOH in different states. (A) The RTP spectra and (B) corresponding time resolved phosphorescence-decay profiles of *m*-Bp-BOH powder, *m*-Bp-BOH-PVA-C film and *m*-Bp-BOH-PVA film under ambient condition.

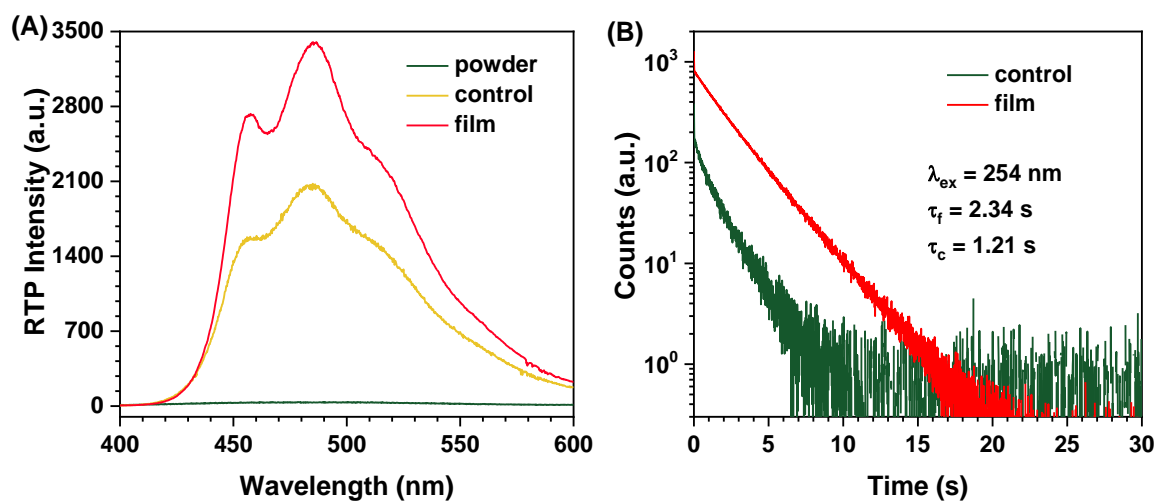

fig. S24. RTP behaviors of *p*-Bp-BOH in different states. (A) The RTP spectra and (B) corresponding time resolved phosphorescence-decay profiles of *p*-Bp-BOH powder, *p*-Bp-BOH-PVA-C film and *p*-Bp-BOH-PVA film under ambient condition.

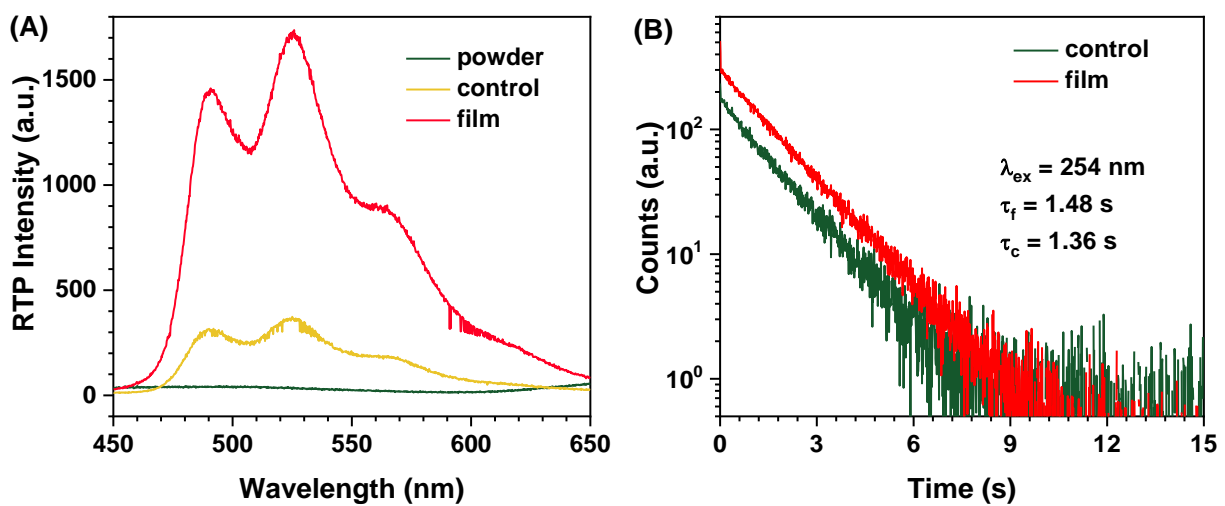

**fig. S25. RTP behaviors of Nap-BOH in different states.** (A) The RTP spectra and (B) corresponding time resolved phosphorescence-decay profiles of **Nap-BOH** powder, **Nap-BOH-PVA-C** film and **Nap-BOH-PVA** film under ambient condition.

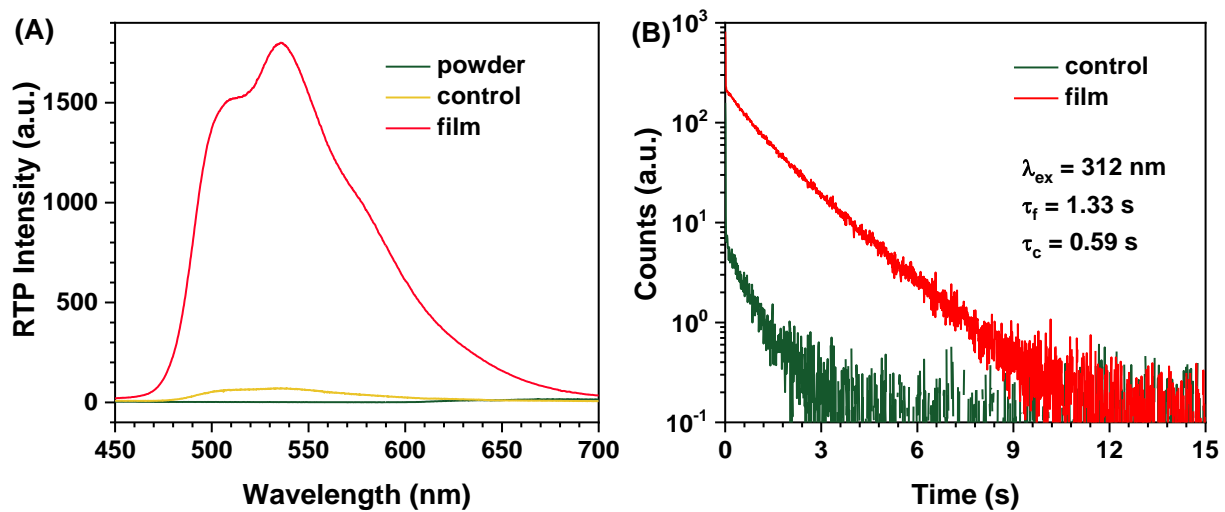

**fig. S26. RTP behaviors of BNap-BOH in different states.** (A) The RTP spectra and (B) corresponding time resolved phosphorescence-decay profiles of **BNap-BOH** powder, **BNap-BOH-PVA-C** film and **BNap-BOH-PVA** film under ambient conditions.

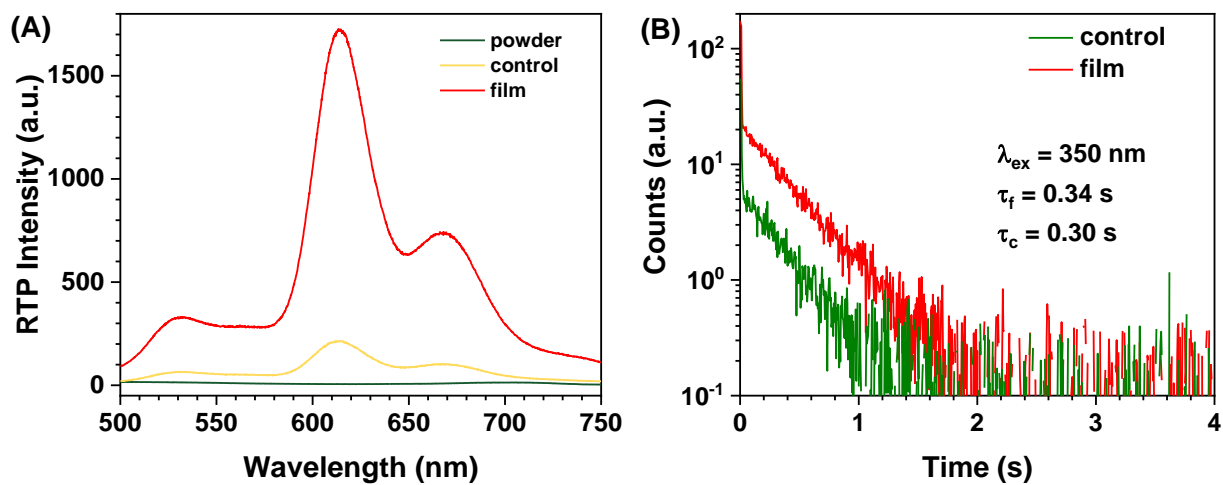

fig. S27. RTP behaviors of Py-BOH in different states. (A) The RTP spectra and (B) corresponding time resolved phosphorescence-decay profiles of Py-BOH powder, Py-BOH-PVA-C film and Py-BOH-PVA film under ambient condition.

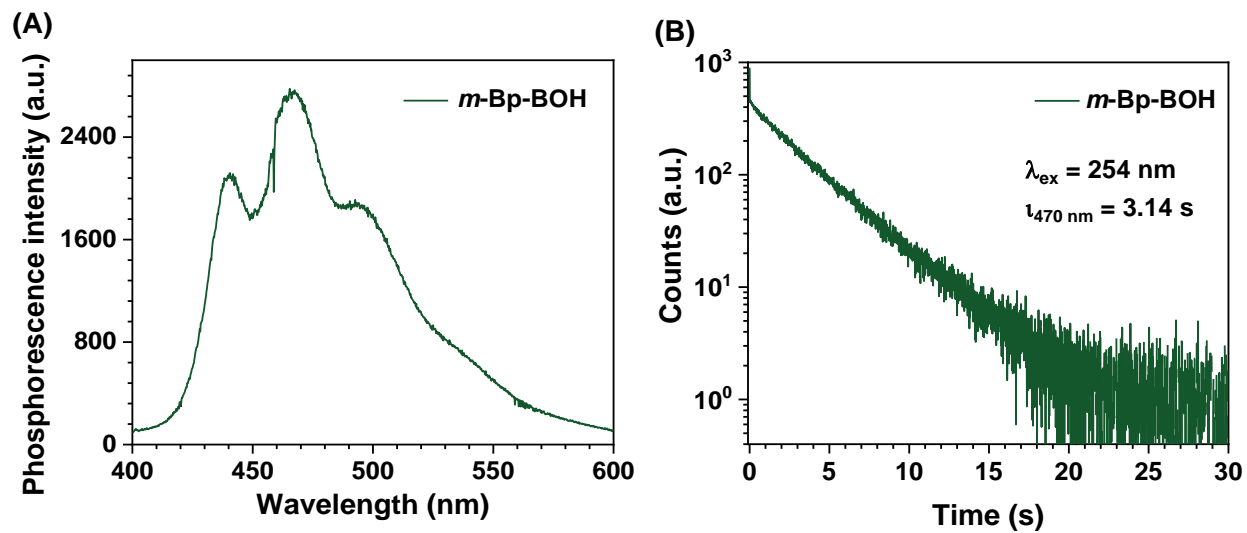

fig. S28. Low temperature phosphorescence of *m*-Bp-BOH solution. (A) Phosphorescence spectrum and (B) corresponding time resolved phosphorescence-decay profile of *m*-Bp-BOH in tetrahydrofuran (THF) solution ( $10^{-5}$  mol/L) at 77 K.

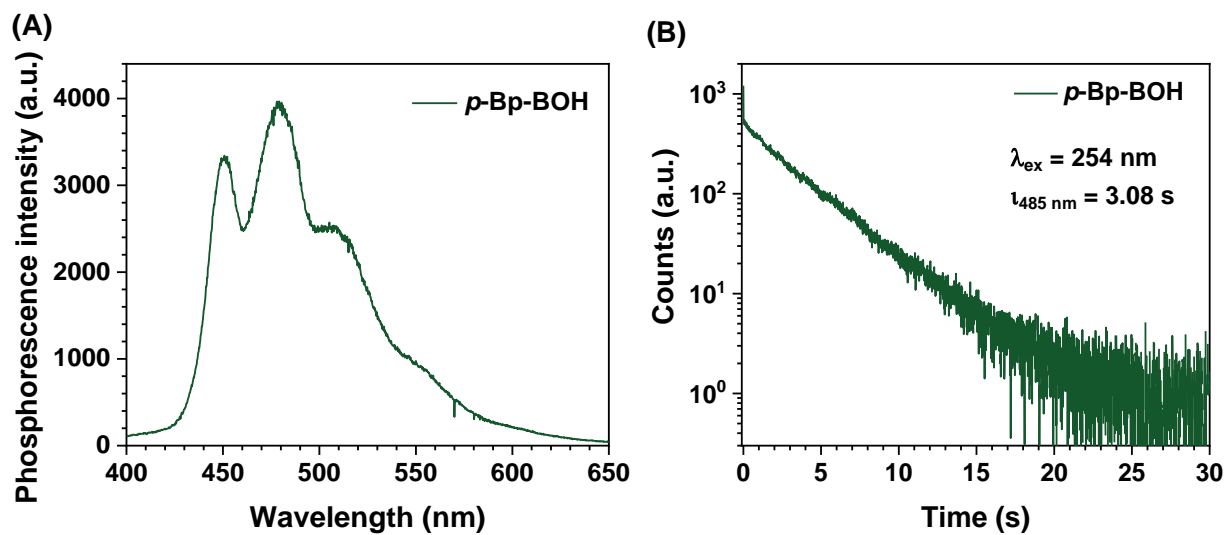

fig. S29. Low temperature phosphorescence of *p*-Bp-BOH solution. (A) Phosphorescence spectrum and (B) corresponding time resolved phosphorescence-decay profile of *p*-Bp-BOH in tetrahydrofuran (THF) solution ( $10^{-5}$  mol/L) at 77 K.

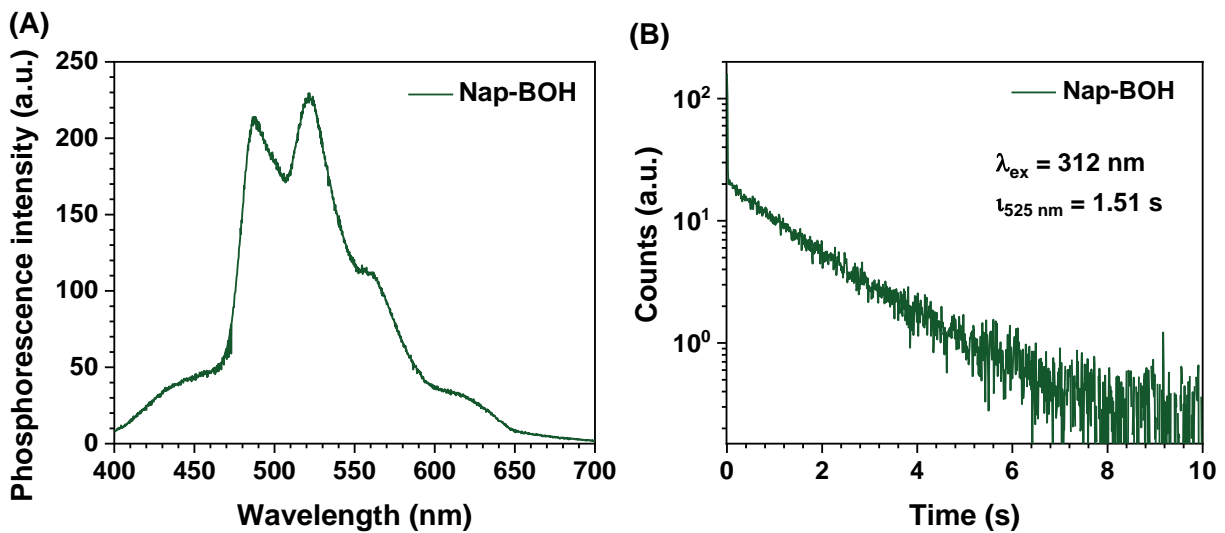

fig. S30. Low temperature phosphorescence of Nap-BOH solution. (A) Phosphorescence spectrum and (B) corresponding time resolved phosphorescence-decay profile of Nap-BOH in tetrahydrofuran (THF) solution ( $10^{-5}$  mol/L) at 77 K.



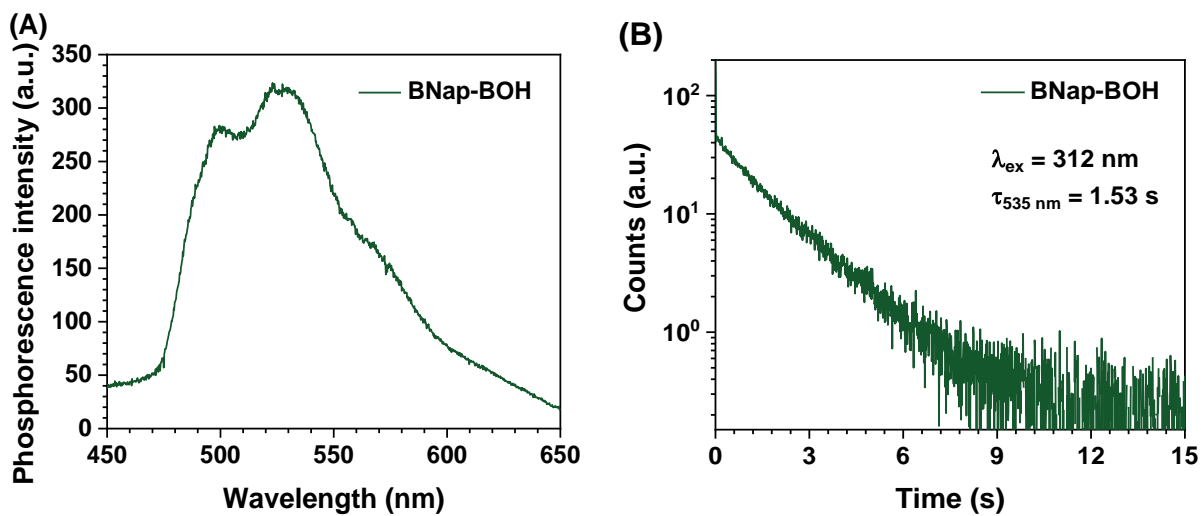

fig. S31. Low temperature phosphorescence of BNap-BOH solution. (A) Phosphorescence spectrum and (B) corresponding time resolved phosphorescence-decay profile of BNap-BOH in tetrahydrofuran (THF) solution ( $10^{-5}$  mol/L) at 77 K.

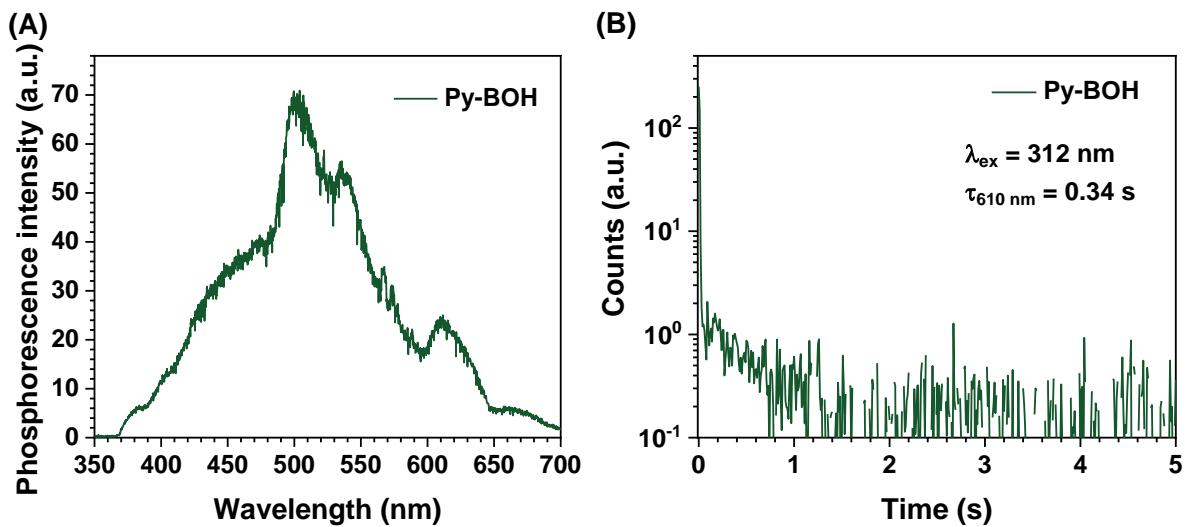

fig. S32. Low temperature phosphorescence of Py-BOH solution. (A) Phosphorescence spectrum and (B) corresponding time resolved phosphorescence-decay profile of Py-BOH in tetrahydrofuran (THF) solution ( $10^{-5}$  mol/L) at 77 K.

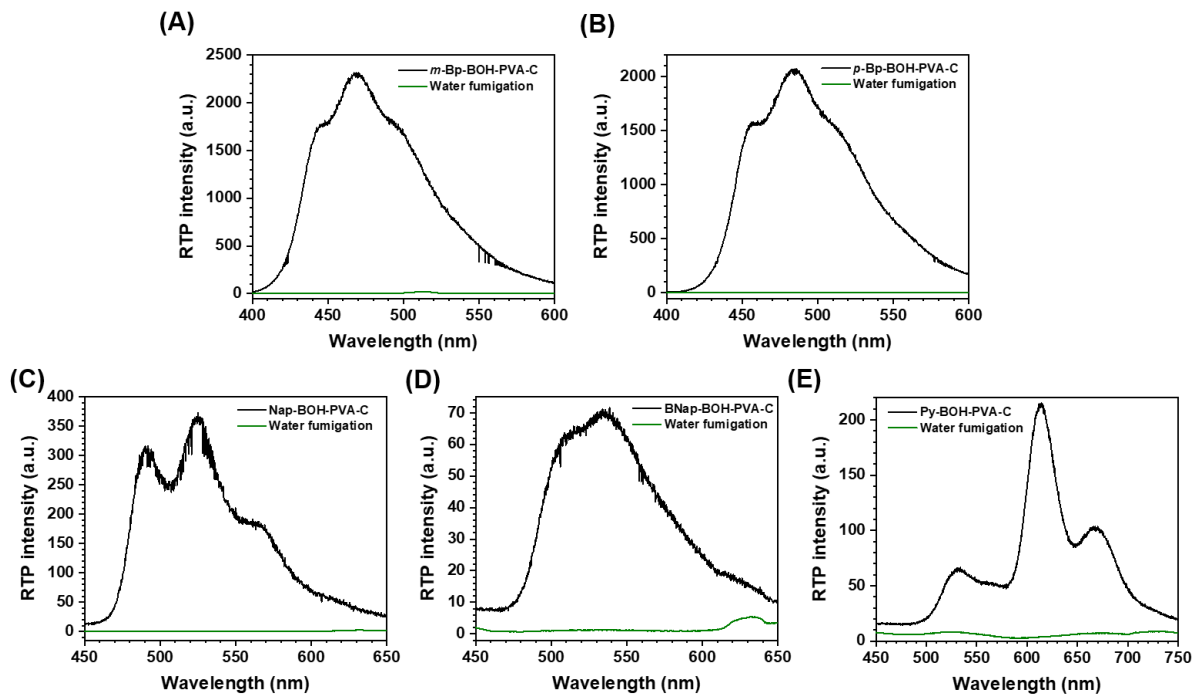

**fig. S33. RTP behaviors of polymers without the addition of ammonia water.** Phosphorescence spectra of (A) *m*-Bp-BOH-PVA-C, (B) *p*-Bp-BOH-PVA-C, (C) Nap-BOH-PVA-C, (D) BNap-BOH-PVA-C and (E) Py-BOH-PVA-C before (black line) and after (green line) water fumigation.

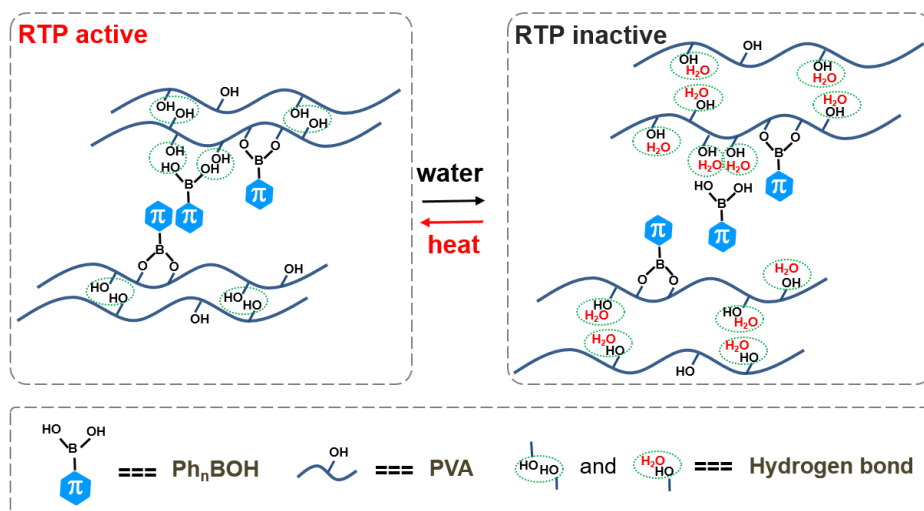

**fig. S34. Stimulus-responsive RTP mechanism.** The illustration about the mechanism of heating/water stimulus-responsive RTP effect.

**table S2. Photophysical data of target polymers.** Dynamic photophysical parameters of five polymer films.

|                            | $\tau_p/s$ | $\Phi_p/\%$ | $k_{p,r}/s^{-1}$ | $k_{p,nr}/s^{-1}$ |
|----------------------------|------------|-------------|------------------|-------------------|
| <b><i>m</i>-Bp-BOH-PVA</b> | 2.43       | 5.40        | 0.0222           | 0.3893            |
| <b><i>p</i>-Bp-BOH-PVA</b> | 2.34       | 12.33       | 0.0527           | 0.3747            |
| <b>Nap-BOH-PVA</b>         | 1.48       | 5.69        | 0.0384           | 0.6371            |
| <b>BNap-BOH-PVA</b>        | 1.33       | 5.84        | 0.0439           | 0.7080            |
| <b>Py-BOH-PVA</b>          | 0.34       | 13.10       | 0.3853           | 2.5559            |

The dynamic photophysical parameters were calculated based on the equations below:

$$\tau_p = 1/(k_{p,r} + k_{p,nr})$$

$$\Phi_p = k_{p,r}/(k_{p,r} + k_{p,nr})$$

Where,  $\tau_p$ ,  $\Phi_p$ ,  $k_{p,r}$  and  $k_{p,nr}$  are the phosphorescence lifetime, phosphorescence quantum yield, radiative rate constant of phosphorescence and non-radiative rate constant of phosphorescence.

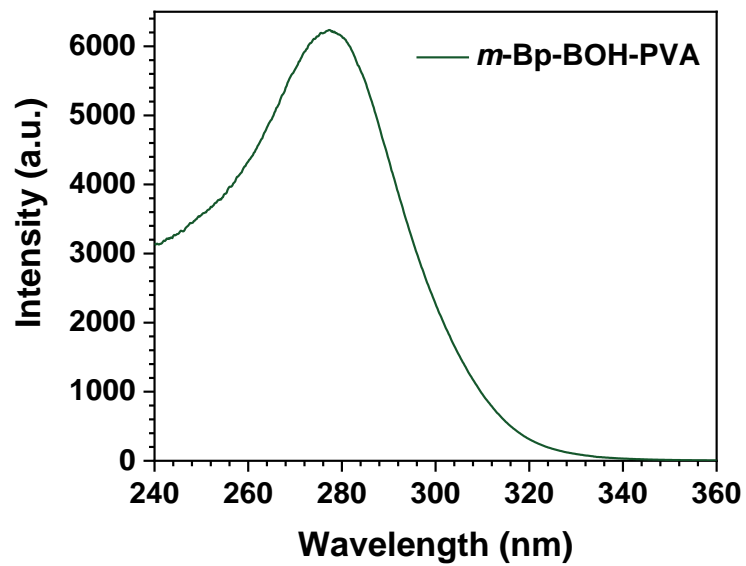

**fig. S35. Phosphorescence excitation spectrum of *m*-Bp-BOH-PVA.** Phosphorescence excitation spectrum of *m*-Bp-BOH-PVA film at the emission wavelength of 470 nm.

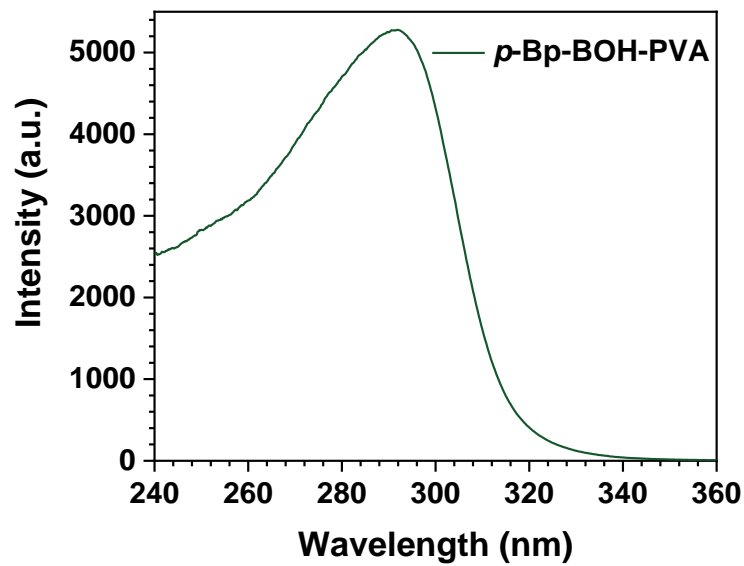

**fig. S36. Phosphorescence excitation spectrum of *p*-Bp-BOH-PVA.** Phosphorescence excitation spectrum of *p*-Bp-BOH-PVA film at the emission wavelength of 485 nm.

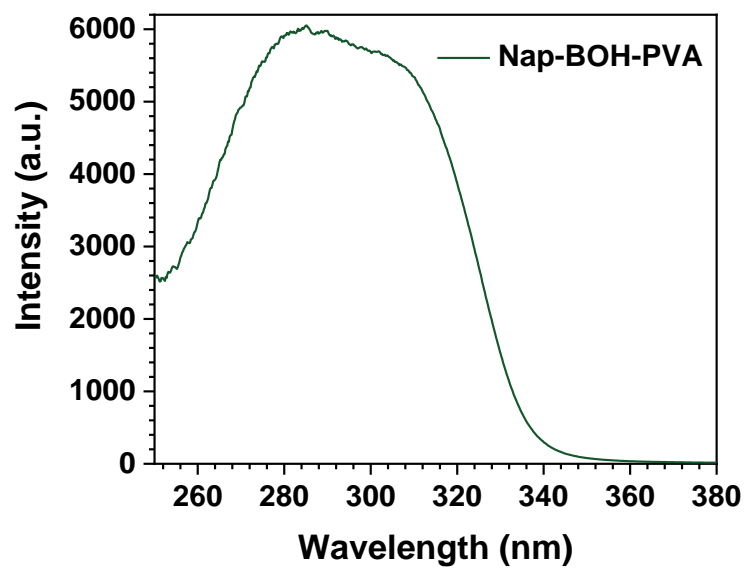

**fig. S37. Phosphorescence excitation spectrum of Nap-BOH-PVA.** Phosphorescence excitation spectrum of **Nap-BOH-PVA** film at the emission wavelength of 525 nm.



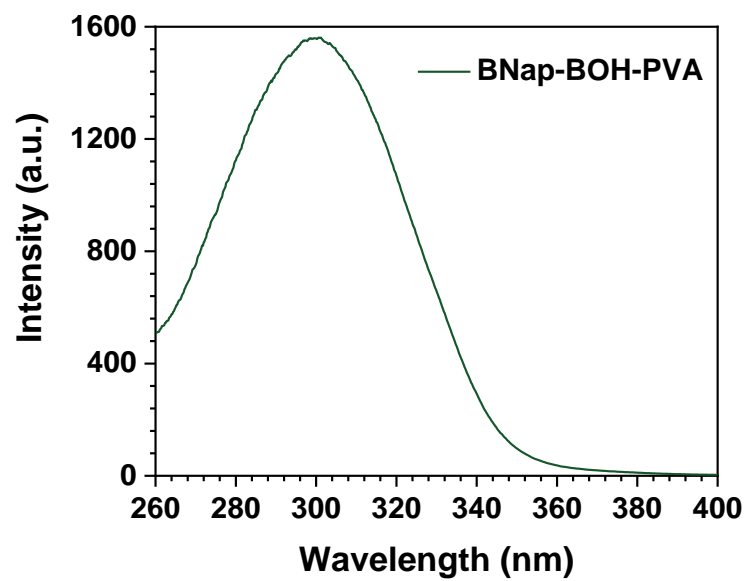

**fig. S38. Phosphorescence excitation spectrum of BNap-BOH-PVA.** Phosphorescence excitation spectrum of BNap-BOH-PVA film at the emission wavelength of 535 nm.

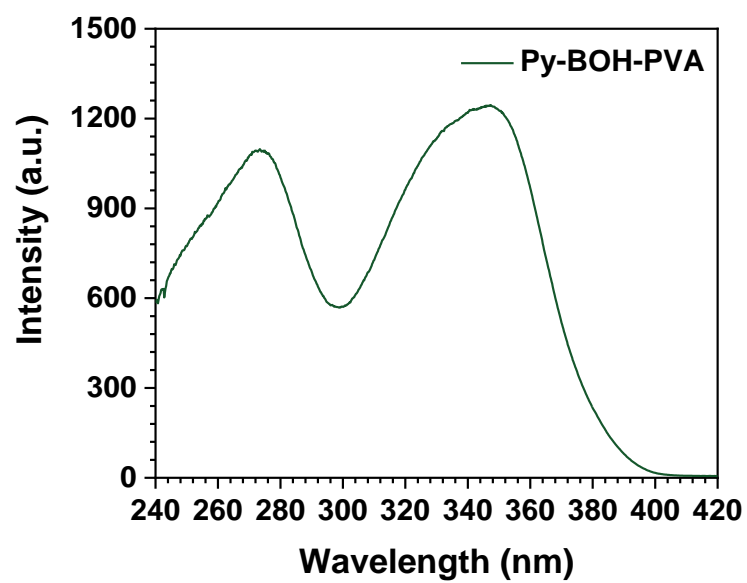

**fig. S39. Phosphorescence excitation spectrum of Py-BOH-PVA.** Phosphorescence excitation spectrum of **Py-BOH-PVA** film at the emission wavelength of 610 nm.

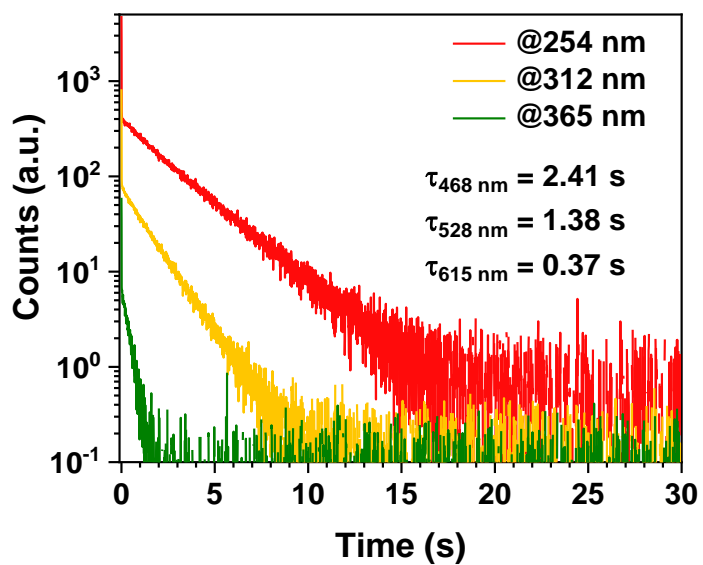

**fig. S40. RTP lifetimes of BNP-BOH-PVA.** Time resolved phosphorescence-decay profiles of **BNP-BOH-PVA** film at different excitation wavelengths under ambient condition.

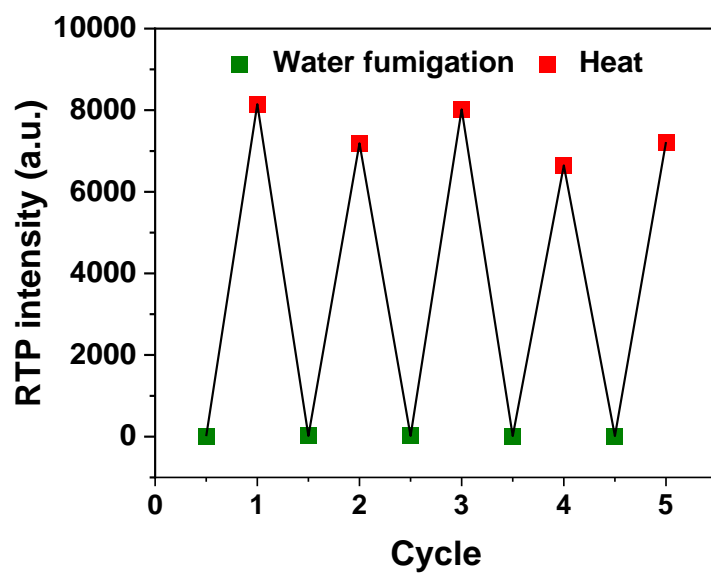

**fig. S41.** Cycles of stimulus-responsive RTP effect of BNP-BOH-PVA upon the excitation of 254 nm. Repeated cycles of the heating/water fuming processes of BNP-BOH-PVA film at the excitation wavelength of 254 nm. The RTP intensity represents the phosphorescence emission intensity at 468 nm at room temperature.

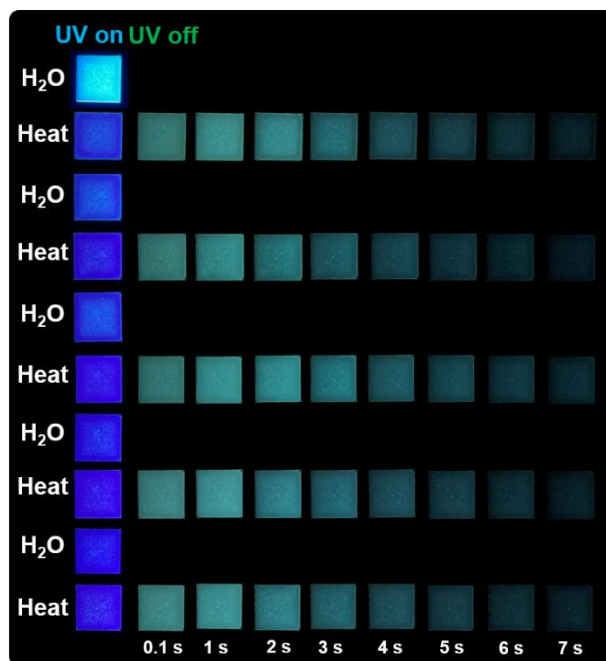

**fig. S42. Photographs of repeated stimulus-responsive RTP effect of BNP-BOH-PVA upon the excitation of 254 nm.** Photographs of repeated cycles of the heating/water fuming processes of BNP-BOH-PVA film at the excitation wavelength of 254 nm.

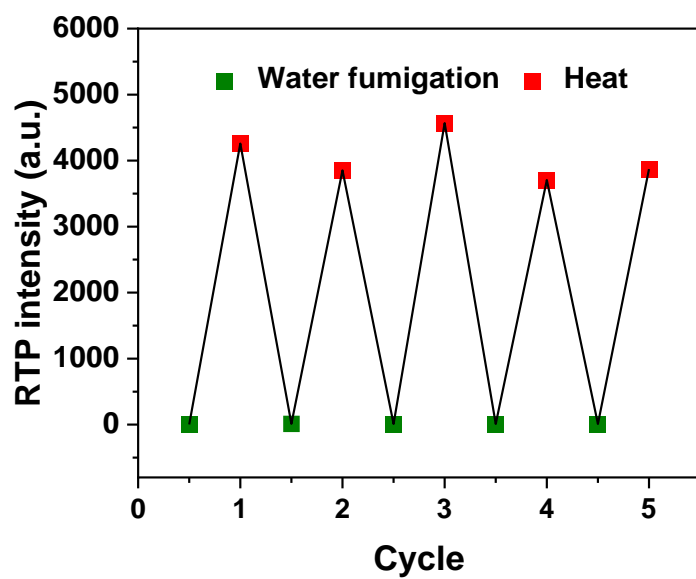

**fig. S43. Cycles of stimulus-responsive RTP effect of BNP-BOH-PVA upon the excitation of 312 nm.** Repeated cycles of the heating/water fuming processes of BNP-BOH-PVA film at the excitation wavelength of 312 nm. The RTP intensity represents the phosphorescence emission intensity at 528 nm at room temperature.

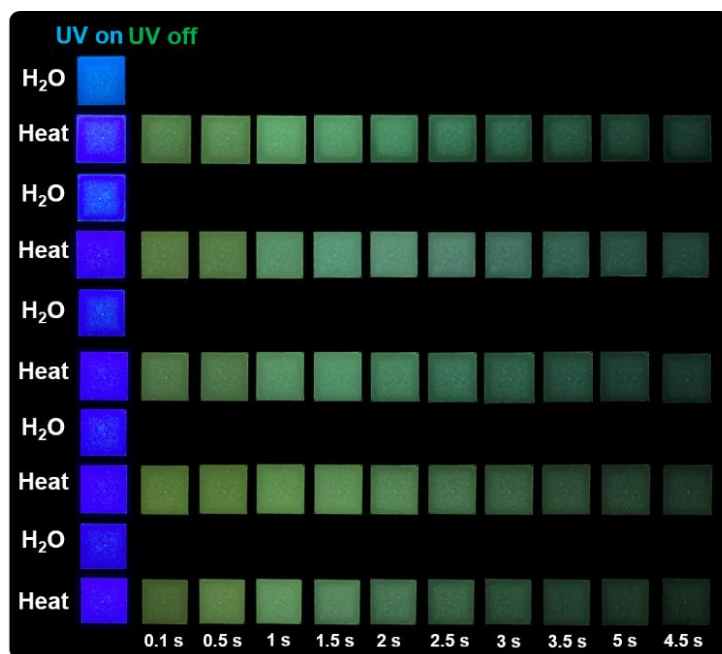

**fig. S44. Photographs of repeated stimulus-responsive RTP effect of BNP-BOH-PVA upon the excitation of 312 nm.** Photographs of repeated cycles of the heating/water fuming processes of **BNP-BOH-PVA** film at the excitation wavelength of 312 nm.

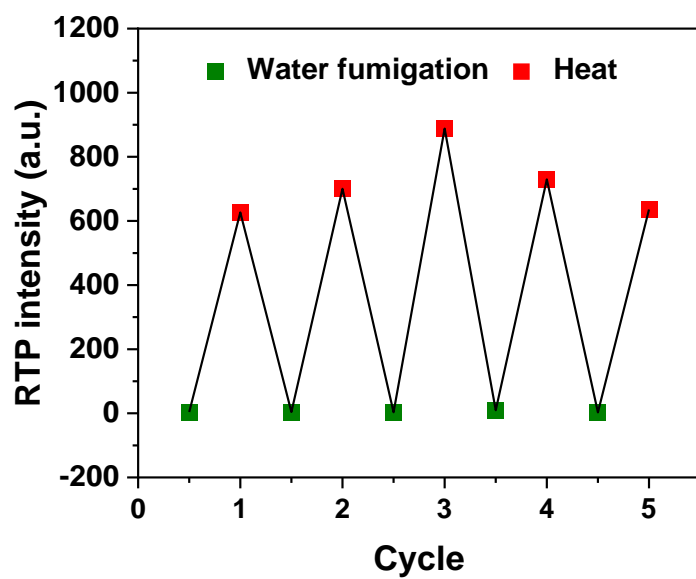

**fig. S45. Cycles of stimulus-responsive RTP effect of BNP-BOH-PVA upon the excitation of 365 nm.** Repeated cycles of the heating/water fuming processes of **BNP-BOH-PVA** film at the excitation wavelength of 365 nm. The RTP intensity represents the phosphorescence emission intensity at 615 nm at room temperature.



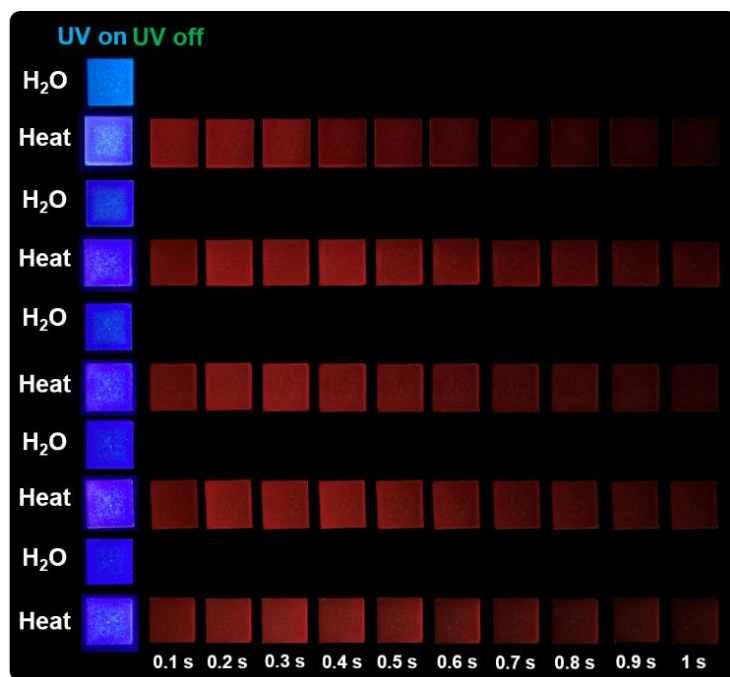

**fig. S46. Photographs of repeated stimulus-responsive RTP effect of BNP-BOH-PVA upon the excitation of 365 nm.** Photographs of repeated cycles of the heating/water fuming processes of BNP-BOH-PVA film at the excitation wavelength of 365 nm.

**movie S1.** The video of heated *m*-Bp-BOH-PVA film before and after turning off the UV lamp with the 254 nm excitation.

**movie S2.** The video of heated *p*-Bp-BOH-PVA film before and after turning off the UV lamp with the 254 nm excitation.

**movie S3.** The video of heated Nap-BOH-PVA film before and after turning off the UV lamp with the 312 nm excitation.

**movie S4.** The video of heated BNap-BOH-PVA film before and after turning off the UV lamp with the 312 nm excitation.

**movie S5.** The video of heated Py-BOH-PVA film before and after turning off the UV lamp with the 365 nm excitation.
